# Supplementary material for: Unconventional conservation reveals structure-function relationships in the synaptonemal complex
Source: eLife. 2021 Nov 17;10:e72061. doi: 10.7554/eLife.72061 (PMC8598163; doi:10.7554/eLife.72061)
Supplement: Figure 3—source data 2. — Note sequence ambiguities. [file elife-72061-fig3-data2.xlsx]

>loxAfr3_ncbiRefSeqPredicted_XM_023542315.1 range=scaffold_216:247768-261578 5'pad=0 3'pad=0 strand=- repeatMasking=none
cacagtgaattctactctgtgtcaccattcatggcaaagactttttcctt
tgtgaccagtgaaaatgccttccgctttcattgtcccatcccttcagccg
tgtttgaagacatgtttgtactcaagaggaaaggtgaggggaggggctgc
tactgtgggccagtctctttgctgggccctttacacacacacacacacac
acacacagtacacacacacacaaacatacacaagtacacacatacacaaa
catacatacacatgcatatgtgcacgcatacatgtgcgcatacacctgca
TGTACATATGTACGCATGTGCAGGCATACATACACATATACGTGCACACA
CACATCGTCATATTAGCCCCACAGCACCCCTGTGGGGTGAGTGGTATTGT
TCCAACTTTAAGGGACAGCGGAAGAATGCATTAGAGGAACCACAGCCGTG
CATGGTAGCACCAGAGTTGAGACCCATGTCTGTCTCATTGAAGTTTCTTT
GTGTGCACTGCCAGATGGCTGATTCTGACCCTGGGGACAGAAACTATGAC
AACATGTTGAAAATGCTGTCAGACCTGAATAAGGACTTGGAAAAGCTACT
GGAAGAGATGGAGAAAATCTCAGgtaggatattttaccagccagctgcct
tcccccttctttccaatagcccaagccctccccacccttctaagctcaaa
tcaattgccttcctgacacccttgcaacccctatggcatgcaactgctct
ttcacaaaatttgacaccgataacagaatgttaccttggatttttttctg
ataattttatgtgtgtttgcaccttatttctgcaaccgactggtattttc
ttcagggcagaaatagtgactcctttagtaactggagaaaccctggtggc
gcagtggttaagtgctgcagctgctaaccaaaagatcagcagttcgaatc
caccaggtgctccttggaaactctatggggcagttctactctgtcctata
gggtcactatgagccgaatcgacttgacggcaacggnnnnnnnnnnnnnn
nnnnnnnnnnnnnnnnnnnnnnnnnnnnnnnnnnnnnnnnnnnnnnnnnn
nnnnnnnnnnnnnnnnnnnnnnnnnnnnnnnnnnnnnnnnnnnnnnnnnn
nnnnnnnnnnnnnnnnnnnnnnnnnnnnnnnnnnnnnnnnnnnnnnnnnn
nnnnnnnnnnnnnnnnnnnnnnnnnnnnnnnnnnnnnnnnnnnnnnnnnn
nnnnnnnnnnnnnnnnnnnnnnnnnnnnnnnnnnnnnnnnnnnnnnnnnn
nnnnnnnnnnnnnnnnnnnnnnnnnnnnnnnnnnnnnnnnnnnnnnnnnn
nnnnnnnnnnnnnnnnnnnnnnnnnnnnnnnnnnnnnnnnnnnnnnnnnn
nnnnnnnnnnnnnnnnnnnnnnnnnnnnnnnnnnnnnnnnnnnnnnnnnn
nnnnnnnnnnnnnnnnnnnnnnnnnnnnnnnnnnnnnnnnnnnnnnnnnn
nnnnnnnnnnnnnnnnnnnnnnnnnnnnnnnnnnnnnnnnnnnnnnnnnn
nnnnnnnnnnnnnnnnnnnnnnnnnnnnnnnnnnnnnnnnnnnnnnnnnn
nnnnnnnnnnnnnnnnnnnnnnnnnnnnnnnnnnnnnnnnnnnnnnnnnn
nnnnnnnnnnnnnnnnnnnnnnnnnnnnnnnnnnnnnnnnnnnnnnnnnn
nnnnnnnnnnnnnncctccttaccaagcatgatgtccttctttccaggga
ctgatccctccctgataacttgtcatagtatgtgagacatagtcttgaca
tccttgcttctaaggagcacttcagttgtacaccttctaagacagatttg
ttcgttcttttggcagtccgttgtgtgttcaatatcctttgccaaaacca
caattcaaaggaatcaattcttcggtcttccttattcatcgtccagcttt
cacatgcatatgagaagatttaaaacaccagagcttgggtcaggtgcacc
ttagtcttcaaggtgacatcttttcttttcaacactttaaagagatcttg
tgcagcagatttgcccagggcaatgcatcttgatttcttgactgctgctt
ccatgggcattgattgtggatcaaagtaaaatgaaatccttgatgacttc
agtcttttctccatttatcgtgatgttgcttattggtccagttgtgagga
tttttgttttatgttgaggtgtaatccatactgaaggctgtggtctttga
tcttcatcagtaagtgtttcaagtcttctttgctttcaaagttatataat
tccttcaatctaattacacattctcctgttaacatttattgattgcctac
tgtgtgctgtgctaggaatataaagttgaatagagatattccttcactag
aagaggtgggtgtgagcctggaacagacatcagcacgattaagtataatt
tcaatatataaattaaaattaaagtagattttcaaaagctgattctttga
aaaaattaacaaaattgataaaccattggccagacagactaaagaaatac
aggaaaggaaacaaataacccgaataagaaacgagatgggccacatcaca
atagacccaactgaaattaaaagaatcatatcggattattacgaaaaatt
gtactctaacaaatttgcaaacctagaagaaatgaattccttgaaaaaca
ctacctacctaaactaacacaatcagaagtagaacaactaaatacatcca
taacaaaaaaagagattgaaatggtaatcaaaaaactcccaacaaaaaaa
gccctggcccagacggctttactgcagagttctaccaaactttcagagaa
gagttaacaccactactactaaaggtatttcaaagcatagaaaatgacgg
aatactgcctaactcattctctgaagccaccatttccctgataccaaaac
caggtgaagacatcacacaaaaaaaaaaaaaagaaaattacacacctata
tccctcatgaacatagatgcaaaaatcctcaacaaaattctagccaatag
aattcaacaacatatcaaaaaaacaatccaccacgaccaagtggaattta
taccaggtatgcaaggctggtttaatattagaaaaaccattaatgtaatc
caccatataaataaaacaaaagacaaaaaccacatgatcttgtcaactga
tgcagaaaaggcatttgacaaagtctaacacccatttatgataaaaactc
tcagtaaaataggaattgaaggaaaattcctaaacataataaagggcatc
tatacaaagccaacagccagcatcactctacatggagagagcctgaaagc
atttctcttgagaacgggaaccagacaaggatgccctttatcatctctct
tattcaacattgtgctagaggtcctagccagagcaattaggctagacaaa
gaaataaagggcatccggattggcaaggaggtagtaaaattatctgtatt
tgcagatgacatgatcttatacacagaaaaccctaaggaatcctccagaa
aactactgaaactaatagaagagtttggcagagtctcaggttataagata
aacatacaaaaatcacttggattcctctacatcgacaaaaagaacatcga
agaggaaatcaccaaaatcaataccattcacggtagccaccaagaagata
aaatacttaggaataattcttaccaaagatgtaaaagacctgtataaaga
aaactacaaagtactactacaagaaactaaaaagaacggacttaagtgga
aaaacataccttgctcgtggannnnnnnnnnnnnnnnnnnnnnnnnnnnn
nnnnnnnnnnnnnnnnnnnnnnnnnnnnnnnnnnnnnnnnnnnnnnnnnn
nnnnnnnnnnnnnnnnnnnnnnnnnnnnnnnnnnnnnnnnnnnnnnnnnn
nnnnnnnnnnnnnnnnnnnnnnnnnnnnnnnnnnnnnnnnnnnnnnnnnn
nnnnnnnnnnnnnnnnnnnnnnnnnnnnnnnnnnnnnnnnnnnnnnnnnn
nnnnnnnnnnnnnnnnnnnnnnnnnnnnnnnnnnnnnnnnnnnnnnnnnn
nnnnnnnnnnnnnnnnnnnnnnnnnnnnnnnnnnnnnnnnnnnnnnnnnn
nnnnnnnnnnnnnnnnnnnnnnnnnnnnnnnnnnnnnnnnnnnnnnnnnn
nnnnnnnnnnnnnnnnnnnnnnnnnnnnnnnnnnnnnnnnnnnnnnnnnn
nnnnnnnnnnnnnnnnnnnnnnnnnnnnnnnnnnnnnnnnnnnnnnnnnn
nnnnnnnnnnnnnnnnnnnnnnnnnnnnnnnnnnnnnnnnnnnnnnnnnn
nnnnnnnnnnnnnnnnnnnnnnnnnnnnnnnnnnnnnnnnnnnnnnnnnn
nnnnnnnnnnnnnnnnnnnnnnnnnnnnnnnnnnnnnnnnnnnnnnnnnn
nnnnnnnnnnnnnnnnnnnnnnnnnnnnnnnnnnnnnnnnnnnnnnnnnn
nnnnnnnnnnnnnnnnnnnnnnnnnnnnnnnnnnnnnnnnnnnnnnnnnn
nnnnnnnnnnnnnnnnnnnnnnnnnnnnnnnnnnnnnnnnnnnnnnnnnn
nnnnnnnnnnnnnnnnnnnnnnnnnnnnnnnnnnnnnnnnnnnnnnnnnn
nnnnnnnnnnnnnnnnnnnnnnnnnnnnnnnnnnnnnnnnnnnnnnnnnn
nnnnnnnnnnnnnnnnnnnnnnnnnnnnnnnnnnnnnnnnnnnnnnnnnn
nnnnnnnnnnnnnnnnnnnnnnnnnnnnnnnnnnnnnnnnnnnnnnnnnn
nnnnnnnnnnnnnnnnnnnnnnnnnnnnnnnnnnnnnnnnnnnnnnnnnn
nnnnnnnnnnnnnnnnnnnnnnnnnnnnnnnnnnnnnnnnnnnnnnnnnn
nnnnnnnnnnnnnnnnnnnnnnnnnnnnnnnnnnnnnnnnnnnnnnnnnn
nnnnnnnnnnnnnnnnnnnnnnnnnnnnnnnnnnnnnnnnnnnnnnnnnn
nnnnnnnnnnnnnnnnnnnnnnnnnnnnnnnnnnnnnnnnnnnnnnnnnn
nnnnnnnnnnnnnnnnnnnnnnnnnnnnnnnnnnnnnnnnnnnnnnnnnn
nnnnnnnnnnnnnnnnnnnnnnnnnnnnnnnnnnnnnnnnnnnnnnnnnn
nnnnnnnnnnnnnnnnnnnnnnnnnnnnnnnnnnnnnnnnnnnnnnnnnn
nnnnnnnnnnnnnnnnnnnnnnnnnnnnnnnnnnnnnnnnnnnnnnnnnn
nnnnnnnnnnnnnnnnnnnnnnnnnnnnnnnnnnnnnnnnnnnnnnnnnn
nnnnnnnnnnnnnnnnnnnnnnnnnnnnnnnnnnnnnnnnnnnnnnnnnn
nnnnnnnnnnnnnnnnnnnnnnnnnnnnnnnnnnnnnnnnnnnnnnnnnn
nnnnnnnnnnnnnnnnnnnnnnnnnnnnnnnnnnnnnnnnnnnnnnnnnn
nnnnnnnnnnnnnnnnnnnnnnnnnnnnnnnnnnnnnnnnnnnnnnnnnn
nnnnnnnnnnnnnnnnnnnnnnnnnnnnnnnnnnnnnnnnnnnnnnnnnn
nnnnnnnnnnnnnnnnnnnnnnnnnnnnnnnnnnnnnnnnnnnnnnnnnn
nnnnnnnnnnnnnnnnnnnnnnnnnnnnnnnnnnnnnnnnnnnnnnnnnn
nnnnnnnnnnnnnnnnnnnnnnnnnnnnnnnnnnnnnnnnnnnnnnnnnn
nnnnnnnnnnnnnnnnnnnnnnnnnnnnnnnnnnnnnnnnnnnnnnnnnn
nnnnnnnnnnnnnnnnnnnnnnnnnnnnnnnnnnnnnnnnnnnnnnnnnn
nnnnnnnnnnnnnnnnnnnnnnnnnnnnnnnnnnnnnnnnnnnnnnnnnn
nnnnnnnnnnnnnnnnnnnnnnnnnnnnnnnnnnnnnnnnnnnnnnnnnn
nnnnnnnnnnnnnnnnnnnnnnnnnnnnnnnnnnnnnnnnnnnnnnnnnn
nnnnnnnnnnnnnnnnnnnnnnnnnnnnnnnnnnnnnnnnnnnnnnnnnn
nnnnnnnnnnnnnnnnnnnnnnnnnnnnnnnnnnnnnnnnnnnnnnnnnn
nnnnnnnnnnnnnnnnnnnnnnnnnnnnnnnnnccattcccgaagacaac
tcatcagacatgaaagggactggacagtgggtaggagagggatgctgaag
gagagtgagctaattatatcaggtggacacttgagactatgttggcatct
cctgtctggaggggggatgggaggatagagagagttggaagctggcaaaa
ttgtcacgaaaggagagactggaagggctgactcattagggggagagcaa
gtgggagtaaggagtaagatatatataaacttatatgtgagagactgact
tgatttgtaaacgttcacttgaagctcaataaaagttaataaaaaaaaaa
aaaaaagaaatggtgctggcataactggatatccatctgcagaaaaatga
aacaagacccatacctcacaccatgcacaaaagctaactcaaaaagggtc
aaagacctaaatataaaatctaaaatgttaaagatcatggaagaaaaaat
agggacaatgttaggagacctaatatatggcataaacagtatacgaaaca
ttactaacaatgcacaaacaccagaagagaaactagataactgggagctc
ctaaaagtcaaacacctattatgctcatccaaagacttcaccgaaagagt
aaaaagattacctacagactgtgaaaaagtttttagctttgacatttcca
atcagcagatgatctctaaaatctacacgatactacaaaaactcaacaac
aaaaagacagcccagttaaaaaatgggcaaaggatatgaacagaacttca
ctaaataagacattcaagtagctaacatatgcaagaggaaatgctcacaa
tcattagccattagagaaatgccaatcaaaactacaatgagatatcatct
gactccaacaactggcattaatccaaaaaacacaaaataataaatgttgg
tgaggctgtggagagactggaacacttatacactgctggtgggaatgtaa
aatgtacaaccactttggaaattgatttggctcttccttaaaaagctaaa
aatagaactactgtacgatccagcagtcccacgccttggaatatatccta
gagaaatgagtctttacatgaacagatatgtgcacaaccatgtttattgc
attccaatcgccagtaactatcaatgcatcttgattgcatgttccatcaa
gttcagactgcagcagctgataaaaatcttctatttcttcatctctggcc
ttagtggttagtgcgtaaatttgaataatagtcgtattaactggtctccc
ttgtaggcatatggatattatcctatcactgacagtgttgtagttcaaaa
tagatcttgaaacgttctttttgacgatgaatgcaacaccatccctcttc
aagttgtcattctcagcatagtacactacataattgtctgattcaaaatg
gccaataccaatccatttcagctcactaatgcctaggatatcaatgttta
tgcattccaaatcatttttgacgatttccaattttcctagattcatactt
cgtacagtccagattccaattattaatggatgttttcagctgtttcttct
cattttgagttgcgccacatcagcaaatgaaggtcctgaaagctttagtc
catccatgtcattaaggtcgactctaatttgaggaggcaactcttcccaa
gtcatcttttgagtgccttccaacctggggggctcatcttccagcactat
atcagacaatgttccactgctagtagttggaaaatatggccttggagata
gaaacaatgccggagatcaaatgacagaattttgcaagaccaacaacttc
ttcattgcaaataccttcttccaccaacataaaatggagactatacacat
ggacttcgccaaatggaacacacagaaatcaaattgactacatctgtgga
aagagatgatggaaagctcaatataatcagtcagaaaaaggccaggggcc
gactgtggaacagaccatcaattgcccatatgcaagttcaagctgaaact
gaagaaaatcagagcaagtccacgagagccaaaatatgaccttgaatata
tcacacctgaatttagaaaccatctgaagaatagatttgatgcattgaac
actggtgaccgaagaccagacaagttgtgaaatgacatcaaggacatcat
acgtgaagaaaacaagaggtcattgaaaagatgggaaaaaaaagaccaag
atggatgtcaggagactctgaaacttgctcttgaatgtcaggcagctaaa
gcaaaaggaagaattgatgaagtaaaagaattgaacagaagatttcaaag
ggcctctcgagaagacaaagtaaagaattataatgacgtgcgaagagctg
gaaatggaaaaccaaaagggaagaatgtgctcggcatttctcaagctgaa
agaactgaagaaaaaattcaagcctagagttgcatannnnnnnnnnnnnn
nnnnnnnnnnnnnnnnnnnnnnnnnnnnnnnnnnnnnnnnnnnnnnnnnn
nnnnnnnnnnnnnnnnnnnnnnnnnnnnnnnnnnnnnnnnnnnnnnnnnn
nnnnnnnnnnnnnnnnnnnnnnnnnnnnnnnnnnnnnnnnnnnnnnnnnn
nnnnnnnnnnnnnnnnnnnnnnnnnnnnnnnnnnnnnnnnnnnnnnnnnn
nnnnnnnnnnnnnnnnnnnnnnnnnnnnnnnnnnnnnnnnnnnnnnnnnn
nnnnnnnnnnnnnnnnnnnnnnnnnnnnnnnnnnnnnnnnnnnnnnnnnn
nnnnnnnnnnnnnnnnnnnnnnnnnnnnnnnnnnnnnnnnnnnnnnnnnn
nnnnnnnnnnnnnnnnnnnnnnnnnnnnnnnnnnnnnnnnnnnnnnnnnn
nnnnnnnnnnnnnnnnnnnnnnnnnnnnnnnnnnnnnnnnnnnnnnnnnn
nnnnnnnnnnnnnnnnnnnnnnnnnnnnnnnnnnnnnnnnnnnnnnnnnn
nnnnnnnnnnnnnnnnnnnnnnnnnnnnnnnnnnnnnnnnnnnnnnnnnn
nnnnnnnnnnnnnnnnnnnnnnnnnnnnnnnnnnnnnnnnnnnnnnnnnn
nnnnnnnnnnnnnnnnnnnnnnnnnnnnnnnnnnnnnnnnnnnnnnnnnn
nnnnnnnnnnnnnnnnnnnnnnnnnnnnnnnnnnnnnnnnnnnnnnnnnn
nnnnnnnnnnnnnnnnnnnnnnnnnnnnnnnnnnnnnnnnnnnnnnnnnn
nnnnnnnnnnnnnnnnnnnnnnnnnnnnnnnnnnnnnnnnnnnnnnnnnn
nnnnnnnnnnnnnnnnnnnnnnnnnnnnnnnnnnnnnnnnnnnnnnnnnn
nnnnnnnnnnnnnnnnnnnnnnnnnnnnnnnnnnnnnnnnnnnnnnnnnn
nnnnnnnnnnnnnnnnnnnnnnnnnnnnnnnnnnnnnnnnnnagttgcaa
aaggacaaaatagtgtatgtgaccactattatatagaactcaagaaatag
tttaaacagagaagaaaattttatgggtggcagtggaagaagagagaggg
tattcactaattagatagtagacaagaactattctaggtgaagggaaagt
caacacacaatacagaaaaggtcagcacaactcgactaaaccaaaagcaa
aggagtttcctgaatacagccgaacacttcaaaggccagcagagcagggg
cgggggtttggggaccatggtttcaggggacatctaggtcaattggcata
ataaaatctattaagaaaacattctcactttggtgagtggtgtctggggt
cttaaacactagcaagcggccatctcagatgcatcaattggtttcaactc
acctggaccaaaggagaatgaagaacaccaaagacaaggtaattatgagc
ccaagagacagaaagacccacataaatcaaagactacatcagcctgcgac
cagaagaactagatagttcccggctacaaccgattactccctcgacaggg
aacacaccagagaatccctgatggagcaggagaacagtgggatgcagacc
tcaaattctcataaaaaaagaccagacttaatggtctgactgagaccaga
aggacactggaggtcatgttagcctcttagccgaggactggaaccattcc
caaagctaactcttcagatagggattggactgcactataagatagaaaat
gacactggtgatgagtgaccttcttgggtcaagtagacacattagactat
gtaggcagctcctgtctggaggggagatgagaaggcagagggggacagac
actggctggatgcacatgggaatacagggtggagagaaggaatgtgttgt
ctcattaggaggacagcaactaggagtacatagcaaggcgtatataaatt
tttgtatgagaggttgacttgatttgtaaactttcactttaaagcacaat
ttaaaaaaaaagtgcacacttgcccctcagaccccgtgctagcacagagc
cactgccctcaggaaattcatgaaggaacaggcaggtgagtaaacagcca
aagctgtggtgagtgccagggggccacacttggtggggacagccaaaaga
tatctggcgcccatagcagaaacctccacaaggagggtacctctgacctg
ggccttctcgaaagcacagaggcggccatatagaggtgggtgggtgacca
gtcactgaacatgcggtcacatgaaacttggaactttgcaggactatgag
tggtaacctatctgagcgtgatcaaacttgcctaagcatggtcaacccac
ctgagtgtggttggacctgcctgagacttacctcagcatggtcagaccta
cttgagcatggtcagccttcctgagcatggtcagatctacctgagcatag
tcagacctacttgagcatggtcagacctacctgaacgtggtcaggctgcc
tgagcatggtcagacctagctgagcatggtcagacctagctgagcatggt
cagacctagctgagcatgatcagacctacctgaatgtggtcaggctgcct
gagcatggtcagccttctggagcatcgtcagacctacctgagcatggtca
gacccacctgagcatggtcatacctacctcagcatggtcaacctgcctga
gcagggtcagacctatctgagcatggtcagacctacgtcagtatggtcag
atctatctaagcatgttcaacctatcttagcatagtcaacctgcctgagc
atggtcagatgtacctgagcatggtcagacctacctgagcatggtcaact
gcctgagtgtagtcagacctacctgaacatggtgagacctacctgagcat
ggtcatacctacctcagcatggtcaacctgcctgagcagggtcagaccta
tctgagcatggtcagacctacgtcagtatggtcagatctatctaagcatg
ttcaacctatctgagcatagtcaacctgcctgagcatggtcagatgtacc
tgagcatggtcagacctacctgagcatggtcaaacctacgtgagcatggt
caaacctacctgagcatggtcaacctacctgagcatgctcaaacctacct
gaacatgcttaaacctacctgagcatgctaaaacctacctgagcatggtc
aaacctacctgagcatggtcaacctacctgagcatggtcagatctgtctg
aattgggtcatacctgcctgagcagggtcagacatacctgagacttacct
gagcatggccagacctgcctgagcatgtgcttgggtggctgtatgattcc
ctgggatcccctgcaaccactggttgtgaactgagagttagtcagggtct
gtggttttctctacttttcctacatttcatattggactggcctccagcct
cttggcactgcgggctgacatttccgcagttgaggcgtgtggcttaggaa
gtttccccactgcactatgtagggggccatgtttgcagggttttatgagc
cctctgacatgcaacctaccaactccctctccttggtgtcttgtgtaccc
acccttaaagagggatatggggtctttgtgggcccactgggtatccagtg
ccctgcggctctgaccagacccgtcggtgtcacagTGCAGGCAACCTGGA
TGGCCTACGACATGGTGGTGATACGCACCAACCCCACGCTGGCCGATTCC
ATGCGGCGGCTAGAGGATGCCTTCTTCAACTGCAAGGAGGAGATGGnnnn
nnnnnnnnnnnnnnnnnnnnnnnnnnnnnnnnnnnnnnnnnnnnnnnnnn
nnnnnnnnnnnnnnnnnnnnnnnnnnnnnnnnnnnnnnnnnnnnnncaag
ctgagaaacaccttcatccctgcgccgtgtctgcctgccatgtagcaaac
gtcgtgtgcaaagcatgaaaagtgtaagaggcagacgctgtcagtgattc
actcatttatttcatgcccatggtgctacgcagagggtaaaaagcaaaag
aaggcccagaccacaacaagccaggcagaggctgaggcagtgcagtgctc
agtggagatttatccaccttgctgagagtgcacagagcagattatgctca
cattctccacagctgccctgatgatggagaccaggaccccgcttcacagg
agtggaaggagaagttgggtgtccaagtccacataactgacaggtgcaga
actaggactaaaccagccttcgtgactctccaacacaactttatcgcaag
gcctggtttagcgggggtggatggtggggatgtagggtggggagagagcc
ccctggaggtgtggtcagggctgggagaccaagcagaggcagagaggaca
agggtccatggcgccagtcagatgggagagctgcagggtggaccccagct
ggtctccaccagggctcgaagggcagaaagctggagaaggaggttgctcc
ccaggatatcctggcccgaggttctcccttccccatcaccttcatggatc
tttgctacctggagccctggggatagaatggtccagccagtgcccttcct
tggctcagcactgactttggggcctcattggtcataggctgctggtgtcc
aggggcctattgacaggttgcatcatgggtgtggcacagataagtcctgg
acccgggagcccagaggagaactctgccttgaggaggggacatttgagca
gagtaggagtttttaaccaggtagaggcttggggcaggttatgttcctgg
cattacagcaacaggaacaatgtcataaggacgctaacatcAGAGGGACT
GCAGGGAGGGGGAAACAAGGCAGAGGGTGCCTGGTCAGCTCACAGAGGAC
AGGGCCTGGGCTCCCCCGCAAGCGGGGCTGTTCTCAGTACAAGGGAGGGA
AGGGGTGGGGGCCGGAATCTCCAGAAACCATGGGAAATCTCTGAAGCACA
AGGTTTATTAGaacaggacatgagcagaaagttctagatccctgccctgt
cccagagccctgcgtctggcagatccaccccaatgcagggtttcctttaa
ggccccggagcccagctgctgcacccgcgtcctccagaggggctcagagc
gcggtctgcagcggggccgcagggggcagggtcaggacaaacgggcagag
aacgcccttactcccccccggacagggctgcagttcctgggcctggaact
gagcggtagcatcagagacagtgaaggtggcggtgacctggtggtttagg
cagtagatggt
